# Supplementary material
Source: PubMed Central journal article supplement (PMC10528807)
Supplement: NIHMS1916940-supplement-1.pdf [file NIHMS1916940-supplement-1.pdf]

**Supplementary Table S1.** Antibody sources and conditions for western blotting, IF, and IHC.

| Antibody          | Source                  | Dilution         | Use      |
|-------------------|-------------------------|------------------|----------|
| RABL6A            | Quelle Lab*             | 1.5 µg/mL        | IHC      |
| SIAH              | 24E6H3<br>Tang Lab**    | 1:40             | IHC      |
| pRB1 S807/811     | CST 8515S               | 1:1000<br>1:1600 | WB<br>IF |
| RB1               | CST 9309S               | 1:1000           | WB       |
| pERK1/2           | Santa Cruz<br>sc-7383   | 1:250            | WB       |
| ERK1/2            | CST 4695S               | 1:1000           | WB       |
| GAPDH             | Abcam<br>ab8245         | 1:5000           | WB       |
| Kappa Light Chain | Sigma<br>SAB5600201     | 1:400            | IHC      |
| CD3               | NeoMarkers<br>RM-9107-S | 1:200            | IHC      |
| B220              | Serotec<br>MCA1258G     | 1:1200           | IHC      |

\* Tompkins V, Hagen J, Zediak VP and Quelle DE (2006) Identification of Novel ARF Binding Proteins by Two-Hybrid Screening, *Cell Cycle*, 5:6, 642-647

\*\*Ahmed AU, Schmidt RL, Park CH, Reed NR, Hesse SE, Thomas CF, Molina JR, Deschamps C, Yang P, Aubry MC, and Tang AM (2008) Effect of Disrupting Seven-in-Absentia Homolog 2 Function on Lung Cancer Cell Growth, *J Natl Cancer Inst*, 100(22): 1606-1629
