# Supplementary material
Source: PubMed Central journal article supplement (PMC10528807)
Supplement: NIHMS1916940-supplement-2.pdf [file NIHMS1916940-supplement-2.pdf]

**Supplementary Table S2.** Antibodies and dyes used for immunophenotyping by flow cytometry.

| Reagent               | Clone       | Company     |
|-----------------------|-------------|-------------|
| Zombie Aqua           | -----       | Biolegend   |
| Anti-CD16/32          | 93          | Biolegend   |
| Anti-CD45 BV605       | 30-F11      | Biolegend   |
| Anti-CD11b PE         | M1-70       | Biolegend   |
| Anti-CD11c BV421      | N418        | Biolegend   |
| Anti-CD3e PE-Cy7      | 145-2C11    | Biolegend   |
| Anti-CD25 PE-Cy5      | PC61.5      | Invitrogen  |
| Anti-CD4 AF700        | GK1.5       | eBioscience |
| Anti-CD8a PerCP-Cy5.5 | 53-6.7      | Biolegend   |
| Anti-CD127 APC        | SB/199      | Biolegend   |
| Anti-CD117 PE Cy      | 2B8         | Biolegend   |
| Anti-FC eR1a APC      | MAR-1       | Biolegend   |
| Anti-NKp46 APC        | 29A1.4      | Biolegend   |
| Anti-B220 PerCP-Cy5.5 | RA3-6B2     | Biolegend   |
| Anti-F4/80 PE-Cy7     | BM8         | Biolegend   |
| Anti-IA/IE AF488      | M5/114.14.2 | Biolegend   |
| Anti-Ly6C PerCP-Cy5.5 | HK1.4       | Biolegend   |
| Anti-Ly6G AF700       | 1A8         | Biolegend   |
