# Supplementary material
Source: PubMed Central journal article supplement (PMC10528807)
Supplement: NIHMS1916940-supplement-3.pdf [file NIHMS1916940-supplement-3.pdf]

**Supplementary Table S3.** Cluster of differentiation (CD) markers used to delineate immune cell populations after gating on CD45+ live cells.

| Cell Type                         | Markers                                                                          |
|-----------------------------------|----------------------------------------------------------------------------------|
| CD4+ T cell                       | B220 <sup>-</sup> CD3e <sup>+</sup> CD4 <sup>+</sup>                             |
| CD8+ T cell                       | B220 <sup>-</sup> CD3e <sup>+</sup> CD8 <sup>+</sup>                             |
| B cell                            | CD3e <sup>-</sup> B220 <sup>+</sup>                                              |
| NK Cell                           | CD3e <sup>-</sup> B220 <sup>-</sup> NKp46 <sup>+</sup>                           |
| Mast Cell                         | CD117 <sup>+</sup> FCeR1a <sup>+</sup>                                           |
| MHCII <sup>Low</sup> immature Mac | CD11b <sup>+</sup> Ly-6C <sup>Hi</sup> F4/80 <sup>Hi</sup> MHC-II <sup>Low</sup> |
| MHCII <sup>Hi</sup> immature Mac  | CD11b <sup>+</sup> Ly-6C <sup>Hi</sup> F4/80 <sup>Hi</sup> MHC-II <sup>Hi</sup>  |
| Ly6C <sup>Hi</sup> Monocyte       | CD11b <sup>+</sup> Ly6C <sup>Hi</sup>                                            |
| Inflammatory Monocyte             | CD11b <sup>+</sup> Ly6C <sup>Low</sup>                                           |
| MHCII <sup>Low</sup> TAM          | Ly6C <sup>Low</sup> F4/80 <sup>Hi</sup> MHCII <sup>Low</sup>                     |
| MHCII <sup>Hi</sup> TAM           | Ly6C <sup>Low</sup> F4/80 <sup>Hi</sup> MHCII <sup>Hi</sup>                      |
| TADCs                             | CD11b <sup>+</sup> CD11c <sup>+</sup>                                            |
| PMNs                              | CD11b <sup>+</sup> Ly6G <sup>+</sup>                                             |
