# Supplementary material
Source: PubMed Central journal article supplement (PMC10528807)
Supplement: NIHMS1916940-supplement-4.pdf [file NIHMS1916940-supplement-4.pdf]

**Supplementary Table S4.** Primers for qRT-PCR analyses.

| <b>Transcript</b> | <b>Forward</b>         | <b>Reverse</b>          |
|-------------------|------------------------|-------------------------|
| <i>Igkc</i>       | GTGCCTCAGTCGTGTGCTTC   | TGCTGCTCATGCTGTAGGTG    |
| <i>Cxcl13</i>     | GGCCACGGTATTCTGGAAGC   | ACCGACAACAGTTGAAATCACTC |
| <i>Ighm</i>       | AACAGAGATCTGCATGTGCC   | TTCGTGGCCTCGCAGATGAG    |
| <i>Iglc2</i>      | AGACTTCGCCATCAGTCACC   | CCAGTCCACTGTCACCACAC    |
| <i>Mzb1</i>       | AGACCTGCTCTCAGAACTGGCA | CATCACGCTGATTCTTGGCTCTG |
| <i>Jchain</i>     | GACGATGGTGTTCCTGAGAC   | CAAGCTAGTCAGGGTAGCAAG   |
| <i>CD38</i>       | TTGCAAGGGTTCTTGAAAC    | CGCTGCCTCATCTACACTCA    |
