# Supplementary material
Source: PubMed Central journal article supplement (PMC10528807)
Supplement: NIHMS1916940-supplement-5.pdf [file NIHMS1916940-supplement-5.pdf]

**Supplementary Table S5.** Abbreviated list of top kinase inhibitory compounds predicted to be effective against MPNSTs from C-Map analyses of the MPNST transcriptome from NF1 patients.

| CMap Class              | Score             | Compound               | Target                                    |
|-------------------------|-------------------|------------------------|-------------------------------------------|
| CDK Inhibitors          | -99.26            | Palbociclib            | CDK4 and 6                                |
|                         | -98.87            | Aminopurvalanol-a      | CDK1, 2, and 5                            |
|                         | -98.62            | Purvalanol-a           | CDK2 and 4                                |
|                         | -98.17            | PHA-793887             | CDK2, 5, and 7                            |
|                         | -97.99            | JNJ-7706621            | CDK1, 2, 3, 4, 6, Aurora A and B          |
|                         | -93.5             | CGP-60474              | CDK1 and 2                                |
| Other Kinase Inhibitors | -99.33            | JAK3 Inhibitor VI      | JAK3                                      |
|                         | -98.24            | ZG-10                  | JNK                                       |
|                         | -97.99            | PF-562271              | FAK                                       |
|                         | -97.43            | HG-5-113-01            | LTK, NTRK2, PKN1, PTK2, PTK2B, SLK, STK10 |
|                         | -97.32            | AS-601245              | JNK                                       |
|                         | -97.19            | Selumetinib            | MEK                                       |
|                         | -96.97            | JNK-9L                 | JNK                                       |
|                         | -96.93            | LDN-193189             | Ser/Thr Kinase Inhibitor                  |
|                         | -96.41            | Dorsomorphin           | AMPK                                      |
|                         | -95.99            | Wortmannin             | PI3K                                      |
|                         | -95.95            | Bisindolylmaleimide-IX | PKC                                       |
| -95.42                  | GDC-0941          | PI3K                   |                                           |
| -93.27                  | Pyrvinium-Pamoate | AKT                    |                                           |
