# Supplementary material
Source: PubMed Central journal article supplement (PMC10528807)
Supplement: NIHMS1916940-supplement-9.pdf [file NIHMS1916940-supplement-9.pdf]

## Supplementary Figure S4

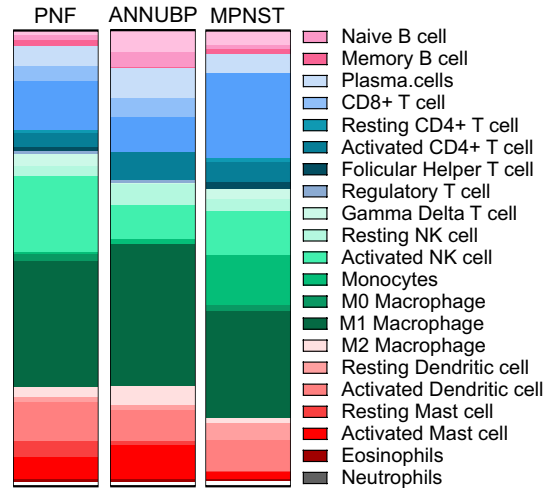

**Supplementary Figure S4. Predicted immune cell composition of human PNFs, ANNUBPs, and MPNSTs based on CIBERSORT analyses.** Patient-matched benign (PNF, ANNUBP) and malignant (MPNST) tumors had previously been examined by RNA sequencing (Kohlmeyer et al, *Clinical Cancer Research* 2020). Deconvolution of the gene expression data was performed using the CIBERSORT method to predict relative proportions of immune cells within the tumors.
